# Supplementary material for: The design of dual-switch fluorescence intensity ratio thermometry with high sensitivity and thermochromism based on a combination strategy of intervalence charge transfer and up-conversion fluorescence thermal enhancement
Source: Royal Society of Chemistry journal article supplement (doi:10.1039/d1dt00882j), 2021-01-01
Supplement: d1dt00882j1.pdf [file d1dt00882j1.pdf]

Design of Dual-switch Fluorescence Intensity Ratio Thermometry with High Sensitivity and Thermochromism Based on Combination Strategy of Intervalence Charge Transfer and Up-conversion Fluorescence Thermal Enhancement

Qiang Wang<sup>a,b</sup>, Min Liao<sup>a,b</sup>, Qiuming Lin<sup>a,b</sup>, Mingxiang Xiong<sup>a,b</sup>, Xin Zhang<sup>c</sup>, Huafeng Dong<sup>c</sup>,  
Zhiping Lin<sup>c</sup>, Minru Wen<sup>c</sup>, Daoyun Zhu<sup>b</sup>, Zhongfei Mu<sup>b,\*</sup>, Fugen Wu<sup>a,\*</sup>

<sup>a</sup> School of Materials and Energy, Guangdong University of Technology, Waihuan Xi Road,  
No.100, Guangzhou, 510006, PR China

<sup>b</sup> Experimental Teaching Department, Guangdong University of Technology, Waihuan Xi Road,  
No.100, Guangzhou, 510006, PR China

<sup>c</sup> School of Physics & Optoelectronic Engineering, Guangdong University of Technology,  
Waihuan Xi Road, No.100, Guangzhou, 510006, PR China

\*corresponding author: muzhongfei@gdut.edu.cn; wufg@gdut.edu.cn

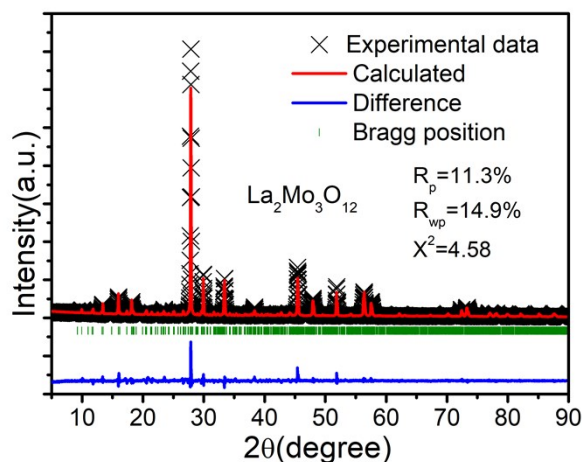

**Fig. S1.** Results of XRD pattern Rietveld refinement of synthesized  $\text{La}_2\text{Mo}_3\text{O}_{12}$  (Experimental (crosses) and calculated (red solid line), the blue solid line represents the difference between experimental and calculated data and the green sticks mark the Bragg reflection positions).

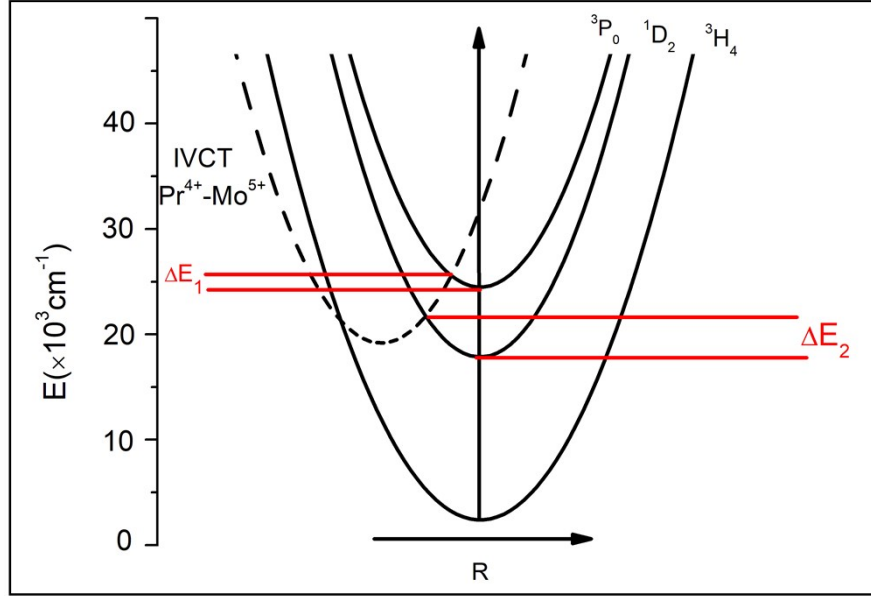

**Fig. S2.** Schematic configurational coordinate diagram for  $\text{Pr}^{3+}$  in the  $\text{La}_2\text{Mo}_3\text{O}_{12}$ .

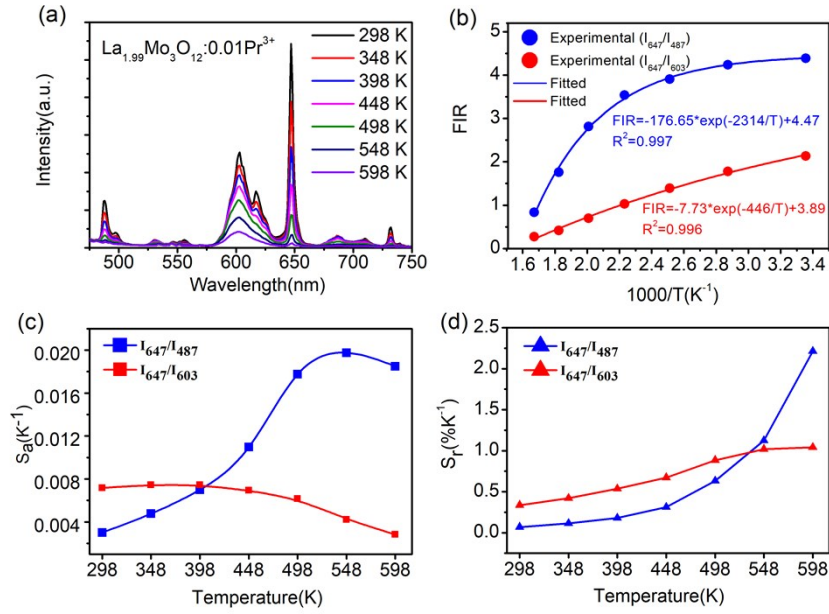

**Fig. S3.** (a) Temperature dependent PL spectra of the  $\text{La}_{1.99}\text{Mo}_3\text{O}_{12}:0.01\text{Pr}^{3+}$  sample (b)

Experimental and fitted plots of FIR ( $I_{647}/I_{487}$  and  $I_{647}/I_{603}$ ) versus  $1000/T$ . (c) The calculated plots of  $S_a$  and versus  $T$ . (d) The calculated plots of  $S_r$  and versus  $T$ .

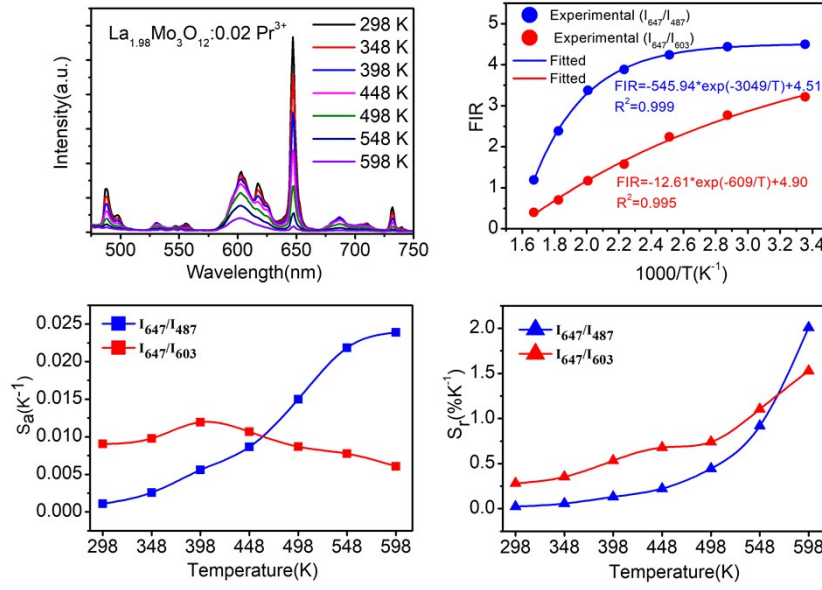

**Fig. S4** (a) Temperature dependent PL spectra of the  $\text{La}_{1.98}\text{Mo}_3\text{O}_{12}:0.02\text{Pr}^{3+}$  sample (b) Experimental and fitted plots of FIR ( $I_{647}/I_{487}$  and  $I_{647}/I_{603}$ ) versus  $1000/T$ . (c) The calculated plots of  $S_a$  and versus T. (d) The calculated plots of  $S_f$  and versus T.

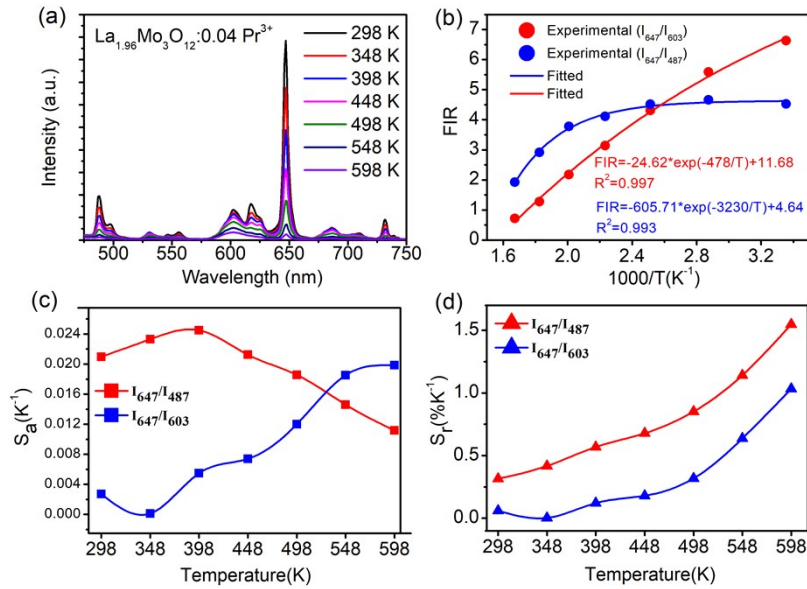

**Fig. S5** (a) Temperature dependent PL spectra of the  $\text{La}_{1.96}\text{Mo}_3\text{O}_{12}:0.04\text{Pr}^{3+}$  sample (b) Experimental and fitted plots of FIR ( $I_{647}/I_{487}$  and  $I_{647}/I_{603}$ ) versus  $1000/T$ . (c) The calculated plots of  $S_a$  and versus T. (d) The calculated plots of  $S_f$  and versus T.

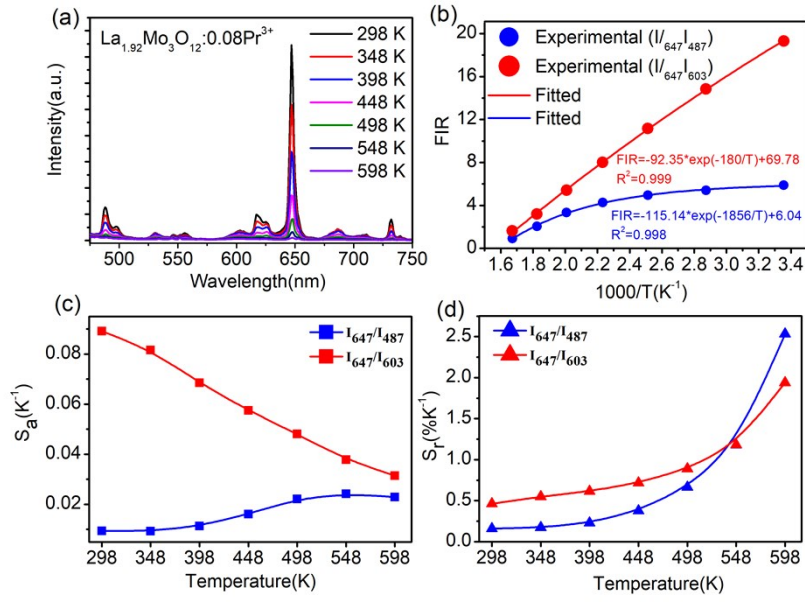

**Fig. S6** (a) Temperature dependent PL spectra of the  $\text{La}_{1.92}\text{Mo}_3\text{O}_{12}:0.08\text{Pr}^{3+}$  sample (b) Experimental and fitted plots of FIR ( $I_{647}/I_{487}$  and  $I_{647}/I_{603}$ ) versus  $1000/T$ . (c) The calculated plots of  $S_a$  and versus T. (d) The calculated plots of  $S_f$  and versus T.

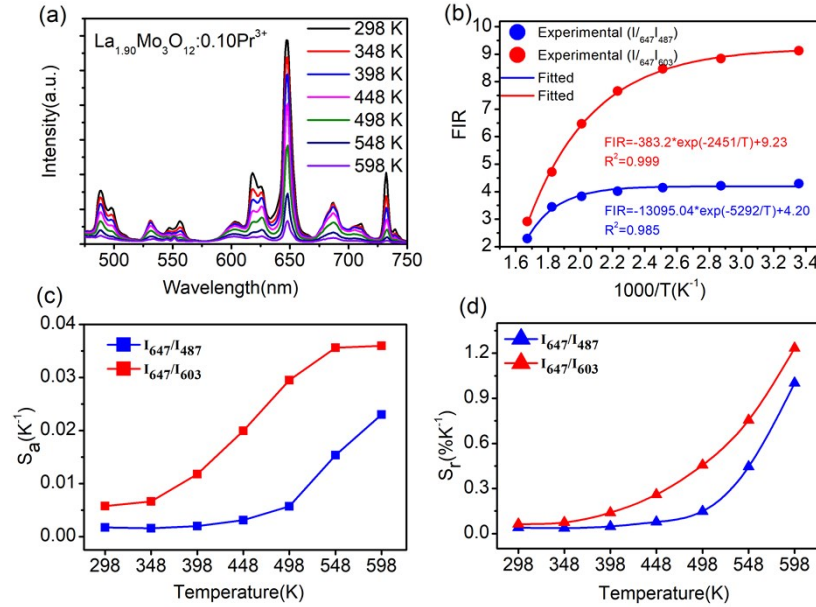

**Fig. S7** (a) Temperature dependent PL spectra of the  $\text{La}_{1.90}\text{Mo}_3\text{O}_{12}:0.10\text{Pr}^{3+}$  sample (b) Experimental and fitted plots of FIR ( $I_{647}/I_{487}$  and  $I_{647}/I_{603}$ ) versus  $1000/T$ . (c) The calculated plots of  $S_a$  and versus T. (d) The calculated plots of  $S_f$  and versus T.

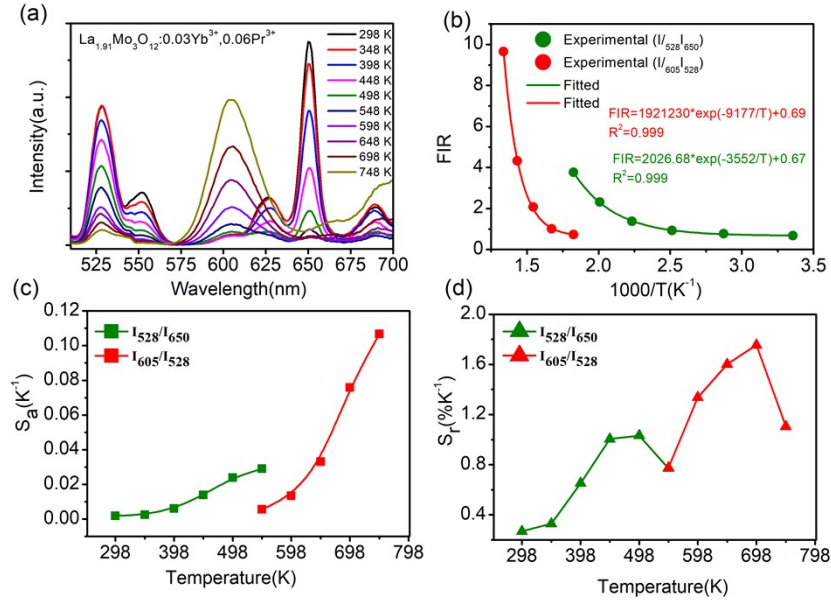

**Fig. S8** (a) Temperature dependent PL spectra of the  $\text{La}_{1.91}\text{Mo}_3\text{O}_{12}:0.03\text{Yb}^{3+}, 0.06\text{Pr}^{3+}$  sample (b) Experimental and fitted plots of two stage FIR ( $I_{528}/I_{650}$  and  $I_{605}/I_{650}$ ) from 298 to 748 K versus  $1000/T$ . (c) The calculated plots of  $S_a$  and versus  $T$ . (d) The calculated plots of  $S_r$  and versus  $T$ .

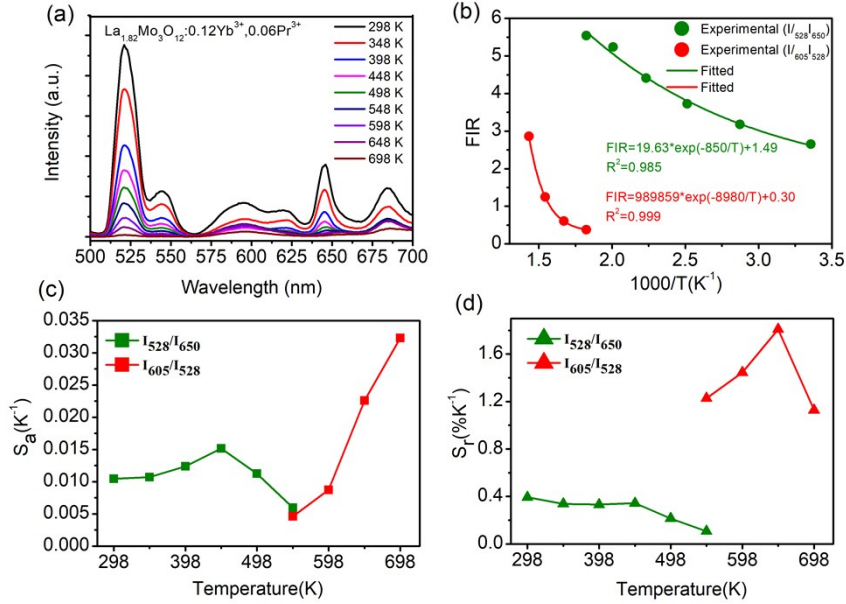

**Fig. S9** (a) Temperature dependent PL spectra of the  $\text{La}_{1.82}\text{Mo}_3\text{O}_{12}:0.12\text{Yb}^{3+}, 0.06\text{Pr}^{3+}$  sample (b) Experimental and fitted plots of two stage FIR ( $I_{528}/I_{650}$  and  $I_{605}/I_{650}$ ) from 298 to 698 K versus  $1000/T$ . (c) The calculated plots of  $S_a$  and versus  $T$ . (d) The calculated plots of  $S_r$  and versus  $T$ .

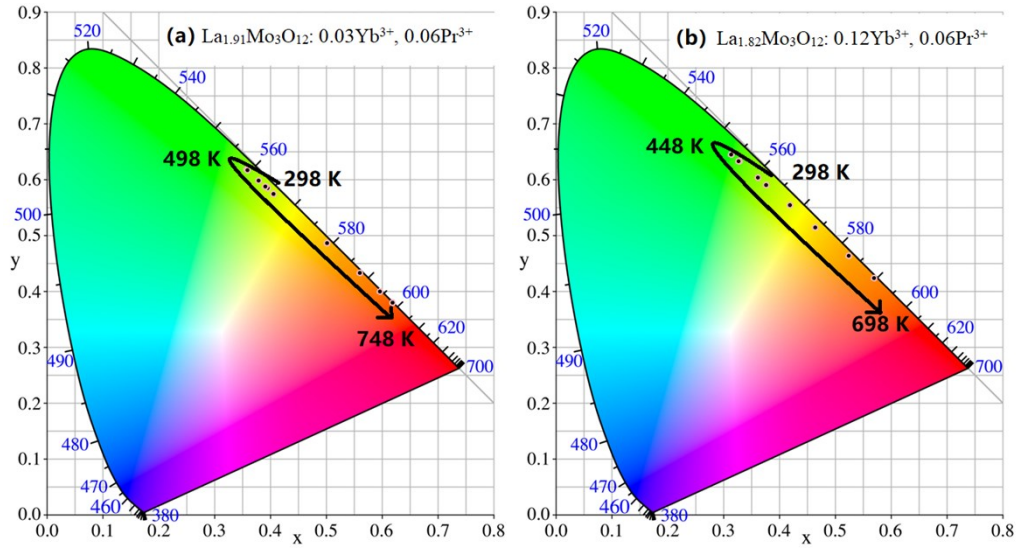

**Fig. S10** CIE chromaticity diagram of (a)  $\text{La}_{1.91}\text{Mo}_3\text{O}_{12}: 0.03\text{Yb}^{3+}, 0.06\text{Pr}^{3+}$  materials; (b)  $\text{La}_{1.82}\text{Mo}_3\text{O}_{12}: 0.12\text{Yb}^{3+}, 0.06\text{Pr}^{3+}$  materials.

**Table S1** Temperature sensing performances of  $\text{Pr}^{3+}$  single-activated  $\text{La}_2\text{Mo}_3\text{O}_{12}$  materials based on PL spectra excited by 450 nm ( $^3\text{P}_0 \rightarrow ^3\text{H}_4$ ,  $^1\text{D}_2 \rightarrow ^3\text{H}_4$  and  $^3\text{P}_0 \rightarrow ^3\text{F}_2$  transitions).

| Samples                                                        | $S_{a-\max}$ ( $\text{K}^{-1}$ ) | $S_{r-\max}$ ( $\% \text{K}^{-1}$ ) | Temperature range<br>(K) |
|----------------------------------------------------------------|----------------------------------|-------------------------------------|--------------------------|
| $\text{La}_{1.99}\text{Mo}_3\text{O}_{12}: 0.01\text{Pr}^{3+}$ | 0.020 (598 K)                    | 2.213 (598 K)                       | 298-598                  |
| $\text{La}_{1.98}\text{Mo}_3\text{O}_{12}: 0.02\text{Pr}^{3+}$ | 0.024 (598 K)                    | 2.008 (598 K)                       | 298-598                  |
| $\text{La}_{1.96}\text{Mo}_3\text{O}_{12}: 0.04\text{Pr}^{3+}$ | 0.025 (398 K)                    | 1.548 (598 K)                       | 298-598                  |
| $\text{La}_{1.94}\text{Mo}_3\text{O}_{12}: 0.06\text{Pr}^{3+}$ | 0.060 (298 K)                    | 2.172 (598 K)                       | 298-598                  |
| $\text{La}_{1.92}\text{Mo}_3\text{O}_{12}: 0.08\text{Pr}^{3+}$ | 0.089 (298 K)                    | 2.532 (598 K)                       | 298-598                  |
| $\text{La}_{1.90}\text{Mo}_3\text{O}_{12}: 0.10\text{Pr}^{3+}$ | 0.036 (598 K)                    | 1.234 (598 K)                       | 298-598                  |

**Table S2** Temperature sensing performances of  $\text{Yb}^{3+}$ ,  $\text{Pr}^{3+}$  co-activated  $\text{La}_2\text{Mo}_3\text{O}_{12}$  materials based on PL spectra excited by 980 nm ( $^3\text{P}_1 \rightarrow ^3\text{H}_5$ ,  $^1\text{D}_2 \rightarrow ^3\text{H}_4$  and  $^3\text{P}_0 \rightarrow ^3\text{F}_2$  transitions).

| Samples                                                                             | $S_{a-\max}$ ( $\text{K}^{-1}$ ) | $S_{r-\max}$ ( $\% \text{K}^{-1}$ ) | Temperature range<br>(K) |
|-------------------------------------------------------------------------------------|----------------------------------|-------------------------------------|--------------------------|
| $\text{La}_{1.91}\text{Mo}_3\text{O}_{12}: 0.03 \text{Yb}^{3+}, 0.06\text{Pr}^{3+}$ | 0.111 (748 K)                    | 1.754 (698 K)                       | 298-748                  |

|                                                                                                     |               |               |         |
|-----------------------------------------------------------------------------------------------------|---------------|---------------|---------|
| La <sub>1.88</sub> Mo <sub>3</sub> O <sub>12</sub> :0.06 Yb <sup>3+</sup> ,<br>0.06Pr <sup>3+</sup> | 0.026 (648 K) | 4.325 (598 K) | 298-748 |
| La <sub>1.82</sub> Mo <sub>3</sub> O <sub>12</sub> :0.12 Yb <sup>3+</sup> ,<br>0.06Pr <sup>3+</sup> | 0.032 (698 K) | 1.809 (648 K) | 298-698 |

**Table S3** CIE coordinates of Yb<sup>3+</sup>, Pr<sup>3+</sup> co-activated La<sub>2</sub>Mo<sub>3</sub>O<sub>12</sub> materials excited by 980 nm.

| Samples                                                                                           | Temperature (K) | $x'$   | $y'$   |
|---------------------------------------------------------------------------------------------------|-----------------|--------|--------|
| La <sub>1.91</sub> Mo <sub>3</sub> O <sub>12</sub> : 0.03 Yb <sup>3+</sup> , 0.06Pr <sup>3+</sup> | 298             | 0.3950 | 0.5848 |
|                                                                                                   | 348             | 0.3910 | 0.5879 |
|                                                                                                   | 398             | 0.3792 | 0.5984 |
|                                                                                                   | 448             | 0.3569 | 0.6186 |
|                                                                                                   | 498             | 0.3585 | 0.6173 |
|                                                                                                   | 548             | 0.4054 | 0.5744 |
|                                                                                                   | 598             | 0.5018 | 0.4861 |
|                                                                                                   | 648             | 0.5596 | 0.4332 |
|                                                                                                   | 698             | 0.5961 | 0.3999 |
|                                                                                                   | 748             | 0.6187 | 0.3797 |
| La <sub>1.88</sub> Mo <sub>3</sub> O <sub>12</sub> : 0.06 Yb <sup>3+</sup> , 0.06Pr <sup>3+</sup> | 298             | 0.3797 | 0.5969 |
|                                                                                                   | 348             | 0.3792 | 0.5970 |
|                                                                                                   | 398             | 0.3711 | 0.6038 |
|                                                                                                   | 448             | 0.3565 | 0.6165 |
|                                                                                                   | 498             | 0.3333 | 0.6368 |
|                                                                                                   | 548             | 0.3319 | 0.6375 |
|                                                                                                   | 598             | 0.3916 | 0.5847 |
|                                                                                                   | 648             | 0.4985 | 0.4873 |
|                                                                                                   | 698             | 0.5786 | 0.4156 |
|                                                                                                   | 748             | 0.6130 | 0.3849 |
| La <sub>1.82</sub> Mo <sub>3</sub> O <sub>12</sub> : 0.12 Yb <sup>3+</sup> , 0.06Pr <sup>3+</sup> | 298             | 0.3617 | 0.6038 |
|                                                                                                   | 348             | 0.3275 | 0.6330 |
|                                                                                                   | 398             | 0.3133 | 0.6454 |
|                                                                                                   | 448             | 0.3266 | 0.6338 |
|                                                                                                   | 498             | 0.3764 | 0.5909 |
|                                                                                                   | 548             | 0.4182 | 0.5550 |
|                                                                                                   | 598             | 0.4642 | 0.5152 |
|                                                                                                   | 648             | 0.5240 | 0.4639 |
|                                                                                                   | 698             | 0.5698 | 0.4240 |
